# Supplementary material
Source: PubMed Central journal article supplement (PMC4428399)
Supplement: mt2014116x1.pdf [file mt2014116x1.pdf]

| siRNA sequence                                          |
|---------------------------------------------------------|
| 5'-GCAAGAUCAUCAUUAGAA -3',<br>3'-UUUCCAUUUCUAAUGAUG -5' |
| 5'-GGGAGGAGAGGACAAAUU -3',<br>3'-CAUCUUUAAUUUGUCCUC -5' |
| 5'-AGAUGAGAAUCAGUGAGA -3',<br>3'-UAUUUCGUCUCACUGAUU -5' |
