# Supplementary material
Source: PubMed Central journal article supplement (PMC4428399)

**a**

| Protein | 14-3-3 motif | Motif mode | On the protein structure                                                           |
|---------|--------------|------------|------------------------------------------------------------------------------------|
| STAR    | RRRSSLL      | I or II    |  |
|         | RDFVSVR      | II         |                                                                                    |
|         | RRGSTC       | I          |                                                                                    |
| VDAC1   | KTKSEN       | I          |  |
|         | RVTQSNF      | II         |                                                                                    |
| TSPO    | RWYASLQ      | II         |  |
|         | RGGSRLP      | II         |                                                                                    |

**b**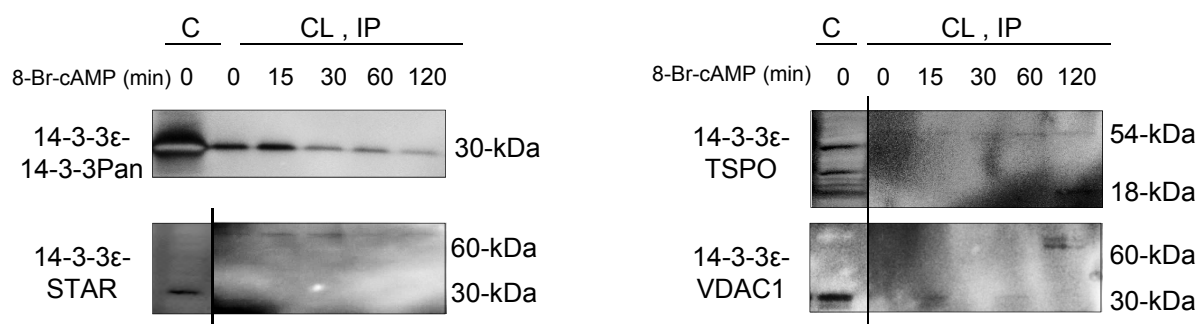

Supplement: mt2014116x2.pdf [file mt2014116x2.pdf]
