# Supplementary material
Source: PubMed Central journal article supplement (PMC4428399)

**a**

| Peptide name | Peptide sequence                     | 14-3-3 motif (aa #)        |
|--------------|--------------------------------------|----------------------------|
| TVS35        | YGRKKRRQRRR-G-KLDLTK <u>S</u> ENGL   | KTK <u>S</u> EN (32-37)    |
| TVS35G       | YGRKKRRQRRR-G-KLDLTK <u>G</u> ENGL   |                            |
| TVS167       | YGRKKRRQRRR-G-SKSRVTQ <u>S</u> NFAVG | RVTQ <u>S</u> NF (163-169) |
| TVS167G      | YGRKKRRQRRR-G-SKSRVTQ <u>G</u> NFAVG |                            |

**b**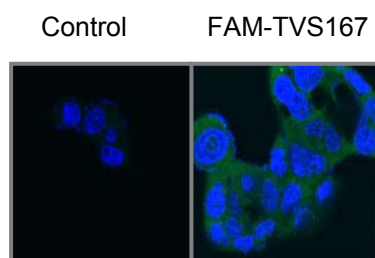

Supplement: mt2014116x3.pdf [file mt2014116x3.pdf]
