# Supplementary material
Source: PubMed Central journal article supplement (PMC4428399)
Supplement: mt2014116x7.pdf [file mt2014116x7.pdf]

**14-3-3e**

Mus MDDREDLVYQAKLAEQAERYDEMVESMKKVAGMDVELTVEERNLLSVAYKNVIGARRASW  
Homo MDDREDLVYQAKLAEQAERYDEMVESMKKVAGMDVELTVEERNLLSVAYKNVIGARRASW  
Rattus MDDREDLVYQAKLAEQAERYDEMVESMKKVAGMDVELTVEERNLLSVAYKNVIGARRASW  
\*\*\*\*\*

Mus RIISSIEQKEENKGGEDKMKMIREYRQMVETELKLICCDILDVLDKHLIPAANTGESKVF  
Homo RIISSIEQKEENKGGEDKMKMIREYRQMVETELKLICCDILDVLDKHLIPAANTGESKVF  
Rattus RIISSIEQKEENTGGEDKMKMIREYRQMVETELKLICCDILDVLDKHLIPAANTGESKVS  
\*\*\*\*\*.

Mus YYKMGDYHRYLAEFATGNDRKEAAENSLVAYKAASDIAMTELPPTHPIRLGLALNFSVF  
Homo YYKMGDYHRYLAEFATGNDRKEAAENSLVAYKAASDIAMTELPPTHPIRLGLALNFSVF  
Rattus YYYKMGDYHRYLAEFATGNDRKEAAENSLVAYKAASDIAMTELPPTHPIRLGLALNFSVF  
\*\* \*\*\*\*\*

Mus YYEILNSPDRACRLAKAAFDDAIAELDTLSEESYKDSTLIMQLLRDNLTLWTSMDMQGDGE  
Homo YYEILNSPDRACRLAKAAFDDAIAELDTLSEESYKDSTLIMQLLRDNLTLWTSMDMQGDGE  
Rattus YYEILNSPDRACRLAKAAFDDAIAELDTLSEESYKDSTLIMQLLRDNLTLWTSMDMQGDGE  
\*\*\*\*\*

Mus EQNKEALQDVEDENQ  
Homo EQNKEALQDVEDENQ  
Rattus EQNKEALQDVEDENQ  
\*\*\*\*\*

**VDAC1**

Mus MAVPPTYADLGKSARDVFTKGYGFGLIKLDLKTKEENGLLEFTSSGSANTETTKVNGSLET  
Rattus MAVPPTYADLGKSARDVFTKGYGFGLIKLDLKTKEENGLLEFTSSGSANTETTKVNGSLET  
Homo MAVPPTYADLGKSARDVFTKGYGFGLIKLDLKTKEENGLLEFTSSGSANTETTKVNGSLET  
\*\*\*\*\*.

Mus KYRWTEYGLTFTEKWNTDNTLGTEITVEDQLARGLKLTFDSSFSPTGKKNNAIKITGYKR  
Rattus KYRWTEYGLTFTEKWNTDNTLGTEITVEDQLARGLKLTFDSSFSPTGKKNNAIKITGYKR  
Homo KYRWTEYGLTFTEKWNTDNTLGTEITVEDQLARGLKLTFDSSFSPTGKKNNAIKITGYKR  
\*\*\*\*\*

Mus EHINLGCDVDFDIAGPSIRGALVLYEGWLAGYQMNFFETSKSRVTQSNFAVGKYTDEFQL  
Rattus EHINLGCDVDFDIAGPSIRGALVLYEGWLAGYQMNFFETSKSRVTQSNFAVGKYTDEFQL  
Homo EHINLGCDMDFDIAGPSIRGALVLYEGWLAGYQMNFFETA~~SKSRVTQSNFAVGKYTDEFQL~~  
\*\*\*\*\*:\*\*\*\*\*:\*\*\*\*\*

Mus HTNVNDGTEFFGGSIIYQKVNKKLETAVNLAWTAGNSNTRFGIAAKYQVDPDACFSKVNNS  
Rattus HTNVNDGTEFFGGSIIYQKVNKKLETAVNLAWTAGNSNTRFGIAAKYQVDPDACFSKVNNS  
Homo HTNVNDGTEFFGGSIIYQKVNKKLETAVNLAWTAGNSNTRFGIAAKYQIDPDACFSKVNNS  
\*\*\*\*\*:\*\*\*\*\*

Mus SLIGLGYTQTLKPGIKLTL~~SALLDGKNNAGGHKLGLEFQA~~  
Rattus SLIGLGYTQTLKPGIKLTL~~SALLDGKNNAGGHKLGLEFQA~~  
Homo SLIGLGYTQTLKPGIKLTL~~SALLDGKNNAGGHKLGLEFQA~~  
\*\*\*\*\*
