# Supplementary material
Source: PubMed Central journal article supplement (PMC4428399)

**a**

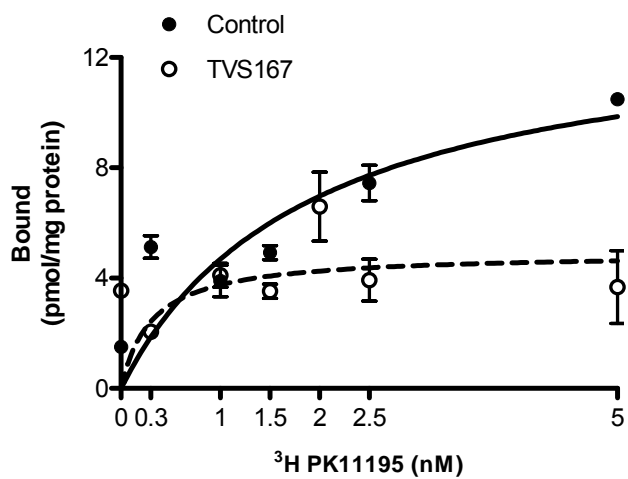

**b**

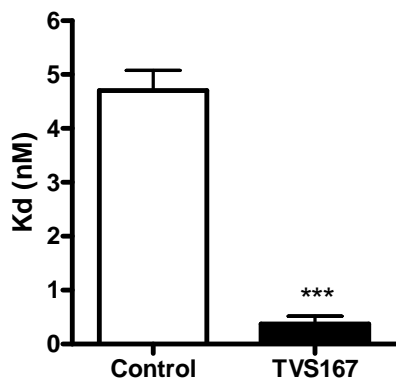

**c**

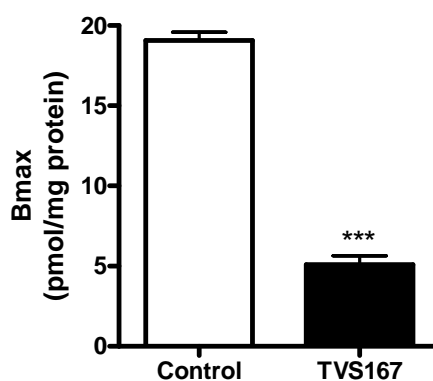

Supplement: mt2014116x4.pdf [file mt2014116x4.pdf]

Figure S5

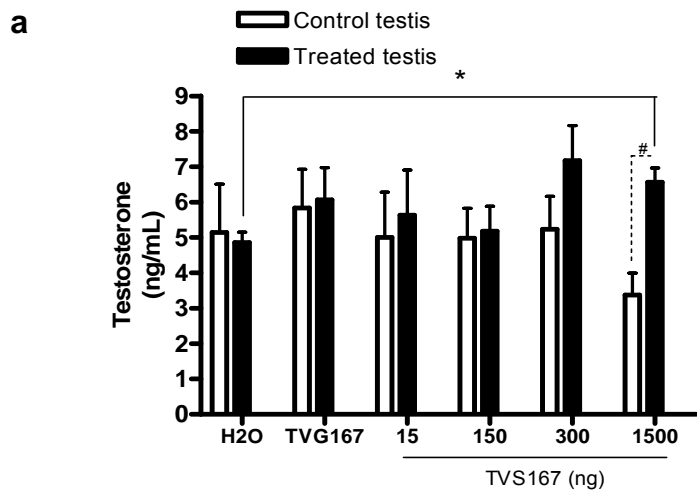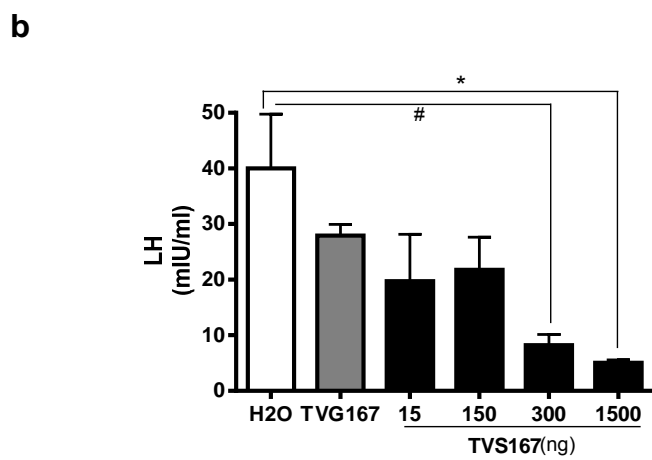

Supplement: mt2014116x5.pdf [file mt2014116x5.pdf]

Figure S6

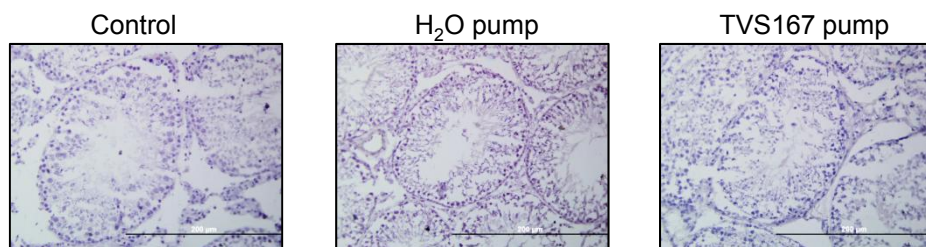

Supplement: mt2014116x6.pdf [file mt2014116x6.pdf]
